# Supplementary material
Source: Springer Nature journal article supplement (https://www.springermedizin.de/resource/supplementary/12888_2012_1096_MOESM5_ESM.pdf/9478994)

## B) Correlations with SAI and Trait Acceptance Scores

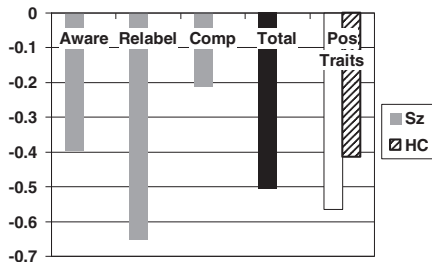

## A) L Precuneus (BA7) -14,-59,48 Positive traits

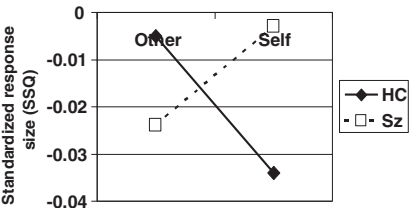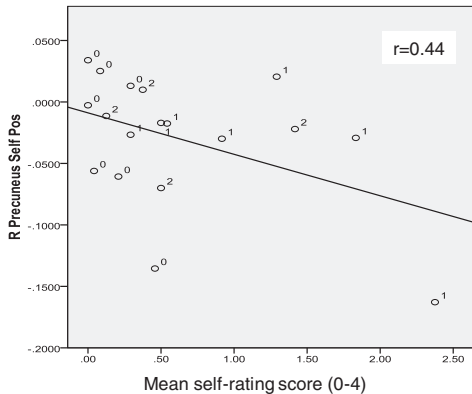

Supplement: MOESM5 [file 9478994]
